# Supplementary material
Source: HighWire-hosted journal article supplement (https://fn.bmj.com/content/102/1/F51)
Supplement: inline-supplementary-material-1 [file inline-supplementary-material-1.pdf]

## Supplementary Table

| <b>SEPSIS PREVENTION IN NICUs GROUP (SPRING): Timeline</b> |                                                                                                                                                                                                                                                                                                                                                                                                                                                                                                                                                                                                                                                                                                                                                                                                                                                                                                                                                                                                                                                                                                                                                                                                                                                                                                                                                                                                                                                                                                                                      |
|------------------------------------------------------------|--------------------------------------------------------------------------------------------------------------------------------------------------------------------------------------------------------------------------------------------------------------------------------------------------------------------------------------------------------------------------------------------------------------------------------------------------------------------------------------------------------------------------------------------------------------------------------------------------------------------------------------------------------------------------------------------------------------------------------------------------------------------------------------------------------------------------------------------------------------------------------------------------------------------------------------------------------------------------------------------------------------------------------------------------------------------------------------------------------------------------------------------------------------------------------------------------------------------------------------------------------------------------------------------------------------------------------------------------------------------------------------------------------------------------------------------------------------------------------------------------------------------------------------|
| Sep-Dec 2011                                               | <p><b>Commencement of SPRING Group meetings: September 2011</b></p> <p><b>Data</b><br/>           Development of Standard Definition of Sepsis<br/>           Target Group Identified: Neonates &lt;29 weeks gestation, censored to 3-35 days<br/>           Development of Standard “on-line” Data Sheet for Sepsis Review</p> <p><b>Quality Improvement</b><br/>           Audit of PICC practice by Clinical Nurse Consultant group<br/>           Agreement to develop standard PICC line insertion and maintenance guidelines for neonates, including development of a DVD demonstrating standard approach</p>                                                                                                                                                                                                                                                                                                                                                                                                                                                                                                                                                                                                                                                                                                                                                                                                                                                                                                                  |
| Jan-June 2012                                              | <p><b>Data:</b><br/>           Data collection commenced, using standard data sheet for sepsis review.</p> <p><b>Quality Improvement</b><br/> <b>Focus on Potentially Better Practices</b><br/>           Literature review of Potentially Better Practices to reduce sepsis.<br/>           Practice changes based on individual NICU requirements.</p> <p>All NICUs:</p> <ul style="list-style-type: none"> <li>• Infection Review Meetings</li> <li>• Development of standard PICC Line Insertion Procedure</li> <li>• Training of hand hygiene champions</li> <li>• Commencement of Hand Hygiene Australia: “5 Moments for Hand Hygiene” initiative: before patient contact, before aseptic task, after body fluid exposure risk, after patient contact, after contact with patient surroundings</li> <li>• Training of hand hygiene champions</li> <li>• Provision of alcohol hand rub/gel adjacent to all NICU beds</li> </ul> <p>Additional practices planned to be introduced into individual NICUs included:</p> <ul style="list-style-type: none"> <li>• Clinical Sinks - sterilisation or relocation</li> <li>• Environmental monitoring</li> <li>• Change in Skin Preparation solutions</li> <li>• Provision of individual patient equipment at the bedside, e.g. stethoscopes, pens</li> <li>• Standardised equipment trolleys or packs for PICC line and IV line insertion.</li> <li>• Review use of gowns and sterile gloves</li> <li>• Change to 48 hour TPN bags to reduce frequency of solution change.</li> </ul> |
| July-Dec 2012                                              | <p><b>Resource Development</b><br/>           Development of automated data retrieval and sepsis reports.<br/>           Development of PICC Line Procedure and Teaching DVD</p> <p><b>Skills Development</b><br/>           Clinical Practice Improvement Workshop, with a focus on Infection Reduction in Neonates, presented by Clinical Excellence Commission.<br/>           Workshop attended by medical and nursing representatives from all participating hospitals.</p>                                                                                                                                                                                                                                                                                                                                                                                                                                                                                                                                                                                                                                                                                                                                                                                                                                                                                                                                                                                                                                                     |

|                           |                                                                                                                                                                                                                                                                                                                                                                                                                                                                                                                                                                                                                                                                                                                                                                                                                                                                                                                                                                                                                                                                                                                                                                                                                                                                             |
|---------------------------|-----------------------------------------------------------------------------------------------------------------------------------------------------------------------------------------------------------------------------------------------------------------------------------------------------------------------------------------------------------------------------------------------------------------------------------------------------------------------------------------------------------------------------------------------------------------------------------------------------------------------------------------------------------------------------------------------------------------------------------------------------------------------------------------------------------------------------------------------------------------------------------------------------------------------------------------------------------------------------------------------------------------------------------------------------------------------------------------------------------------------------------------------------------------------------------------------------------------------------------------------------------------------------|
| <p>Jan-June<br/>2013</p>  | <p><b>Data</b><br/>Monthly Sepsis reports reviewed by SPRING group</p> <p><b>Quality Improvement</b><br/><b>Focus on Standard Approach to PICC Insertion and Management</b><br/>Neonatal PICC Insertion DVD launched (Feb 2013)<sup>24</sup><br/>Education sessions on standard PICC line insertion and management in all NICUs for medical and nursing staff, including demonstration using teaching video.<br/>PICC line insertion video provided to staff in all NICUs via Neonatal Database or Perinatal Services Network website: <a href="http://www.psn.org.au/clinical-resources">http://www.psn.org.au/clinical-resources</a><br/>Standard approach to PICC line insertion introduced into all NICUs by May 2013, including:</p> <ol style="list-style-type: none"> <li>1. Training for clinicians inserting PICC lines</li> <li>2. Two person procedure</li> <li>3. Clinician asepsis bundle: 2 minute procedural hand wash, sterile gown, gloves, hat, mask</li> <li>4. Patient asepsis bundle: skin asepsis, full drape of patient</li> <li>5. Surveillance of procedure</li> <li>6. Documentation of procedure, including PICC line insertion form</li> </ol>                                                                                                  |
| <p>July- Dec<br/>2013</p> | <p><b>Data</b><br/>Monthly Automated SPRING reports distributed automatically to Senior Medical and Nursing Staff (including Neonatologists, Nursing Unit Manager, Clinical Nurse Consultant, Audit Officer) for 7 of 8 participating NICUs.</p> <p><b>Quality Improvement</b><br/><b>Focus on peripheral intravenous lines.</b><br/>Agreed to standardise approach to peripheral IVs, including:<br/>Use of sterile gloves and Aseptic Non-Touch Technique for IV insertion.<br/>Use of “scrub the hub” procedure prior to access using either 2% Chlorhexidine and 70% alcohol swabs (preferred), or standard alcohol swabs</p> <p><b>Additional review of:</b><br/>Skin asepsis solutions – no consensus, due to limited evidence of best practice</p> <ul style="list-style-type: none"> <li>- All NICUs using Chlorhexidine (<math>\leq 0.5\%</math>) <math>\pm</math> cetrimide</li> <li>- Chlorhexidine 2% not used due to poor skin integrity in ELBW neonates</li> <li>- Iodine not used due risk of thyroid suppression</li> </ul> <p><b>Individual unit strategies including:</b></p> <ul style="list-style-type: none"> <li>- Relocation or upgrading hand-washing sinks</li> <li>- Decontamination using hydrogen peroxide vaporiser to reduce MRSA</li> </ul> |

|                          |                                                                                                                                                                                                                                                                                                                                                                                                                                                                                                                                                                                                                                                                                                                               |
|--------------------------|-------------------------------------------------------------------------------------------------------------------------------------------------------------------------------------------------------------------------------------------------------------------------------------------------------------------------------------------------------------------------------------------------------------------------------------------------------------------------------------------------------------------------------------------------------------------------------------------------------------------------------------------------------------------------------------------------------------------------------|
| <p>Jan-June<br/>2014</p> | <p><b>Data</b><br/>All NICUs receiving regular monthly data reports</p> <p><b>Quality Improvement</b><br/>All NICUs using standard approach to PICC line insertion and actively involved in quality improvement activities</p> <p><b>Focus on Hand Hygiene</b><br/>5 Moments for Hand Hygiene<br/>Hand hygiene audits<br/>Access to alcohol-based hand rub/gel at all beds<br/>Hand Hygiene Champions<br/>“Memorable” phrases to remind staff: e.g. “Gel-baby-gel”, “Rub-a-Dub Dub, Scrub the Hub”, “Have you “pinked” today?”</p> <p><b>Review of:</b> peripheral IV management, surveillance swabs and antibiotic use.<br/>Exchange of ideas on how to support early introduction of breast milk and skin-to-skin care.</p> |
| <p>July-Dec<br/>2014</p> | <p><b>Data</b><br/>Demonstration of decreased infection rates.</p> <p><b>Quality Improvement</b><br/><b>Focus on Equipment</b><br/>Production of Standard Australian PICC Insertion Packs. “Aus PICC Tray”<br/>Order Code VY-80199.1249<br/>Review of needleless IV ports and extension tubing (“chooks feet”)</p>                                                                                                                                                                                                                                                                                                                                                                                                            |
